# Supplementary material for: Production of Human Endothelial Cells Free from Soluble Xenogeneic Antigens for Bioartificial Small Diameter Vascular Graft Endothelization
Source: Hindawi journal article supplement (doi:10.1155/2015/652474), 2015-01-01
Supplement: f1 [file 652474.f1.pdf]

## **SUPPLEMENTAL MATERIAL**

### **SUPPLEMENTAL MATERIALS AND METHODS**

#### **qPCR**

Total RNA was extracted from hASCs, hASC-ECs and HUVECs, using Trizol, as described by the manufacturer. Total RNA samples were then treated with DNase (Promega), according to usage information. A NanoDrop ND-1000 Microspectrophotometer was used to measure the total RNA amount (ng/ $\mu$ L). 1  $\mu$ g of each sample was treated with the RevertAid<sup>TM</sup> H Minus M-MuLV RT (Fermentas) to generate cDNA using an oligo(dT) adapter primer. Next, qPCR amplification was performed for the CD31 and GAPDH genes.

qPCR was performed using the 7900 Real-Time PCR System (Applied Biosystems) using SYBRGreen Master mix (Applied Biosystems). The following primers were used: GAPDH - FP: ACATCGCTCAGACACCATG, RP: TGTAGTTGAGGTCAATGAAGGG; CD31 - FP: ACGGAAGTTCAAGTGTCTCAG, RP: GCTTTCCACGGCATCAGGGA. The relative level of gene expression was determined by the comparative cycle threshold (Ct) method with each sample normalized to GAPDH and expressed as a relative change. Each sample was run in triplicate. Results were averaged and expressed as relative amounts. Comparisons were made between samples processed at the same time.

#### **Statistical analysis**

Statistical analyses were performed using Graph Pad Prism 5.0. Values were presented as mean  $\pm$  standard deviation. Groups were compared by analysis of variance and Bonferroni's post-tests. Differences were considered significant at  $p < 0.05$ .

## SUPPLEMENTAL FIGURE

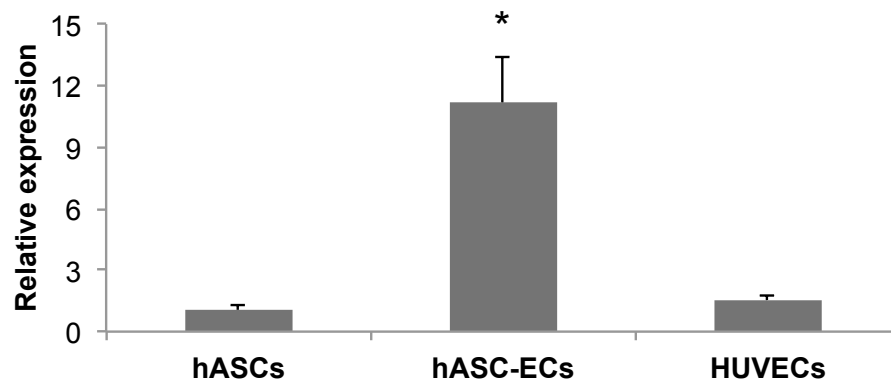

Figure S.1: Relative expression of CD31. CD31 expression, normalized to GAPDH, was assessed by qPCR in undifferentiated hASCs, differentiated hASC-ECs and HUVECs. \* $p < 0,05$  compared to control (hASCs).
